# Supplementary material for: Non‐metastatic muscle‐invasive bladder cancer: the role of age in receiving treatment with curative intent
Source: PubMed Central journal article supplement — BJU Int. 2022 Feb 8;130(6):764–75. doi: 10.1111/bju.15697 (PMC9790563; doi:10.1111/bju.15697), 2022-02-08
Supplement: BJU-130-764-s002.pdf [file BJU-130-764-s002.pdf]

Supplementary Table 1: Patient-, tumour- and hospital characteristics of patients diagnosed with non-metastatic MIBC between 2005-2019, by treatment

|                                                        | Total |           | Treatment |           | p-value* |           |        |
|--------------------------------------------------------|-------|-----------|-----------|-----------|----------|-----------|--------|
|                                                        |       |           | Untreated |           |          | Treated   |        |
|                                                        | N     | (%)       | N         | (%)       |          | N         | (%)    |
| <b>Total</b>                                           | 15047 | (100.0)   | 3236      | (21.5)    | 11811    | (78.5)    |        |
| Patient characteristics                                |       |           |           |           |          |           |        |
| <b>Gender</b>                                          |       |           |           |           |          |           | 0.0002 |
| Male                                                   | 10990 | (73.0)    | 2282      | (70.5)    | 8708     | (73.7)    |        |
| Female                                                 | 4057  | (27.0)    | 954       | (29.5)    | 3103     | (26.3)    |        |
| <b>Age at diagnosis (median, IQR)</b>                  | 74.0  | 66.0-81.0 | 82.0      | 75.0-86.0 | 72.0     | 66.0-81.0 | <.0001 |
| <b>Age at diagnosis</b>                                |       |           |           |           |          |           | <.0001 |
| <75 years                                              | 7819  | (52.0)    | 777       | (24.0)    | 7042     | (59.6)    |        |
| ≥75 years                                              | 7228  | (48.0)    | 2459      | (76.0)    | 4769     | (40.4)    |        |
| <b>Weighted Charlson Comorbidity Index</b>             |       |           |           |           |          |           | <.0001 |
| 0                                                      | 1455  | (36.5)    | 184       | (23.7)    | 1271     | (39.7)    |        |
| 1                                                      | 1101  | (27.6)    | 213       | (27.4)    | 888      | (27.7)    |        |
| 2                                                      | 607   | (15.2)    | 153       | (19.7)    | 454      | (14.2)    |        |
| 3 or more                                              | 499   | (12.5)    | 166       | (21.3)    | 333      | (10.4)    |        |
| Unknown                                                | 320   | (8.0)     | 62        | (8.0)     | 258      | (8.1)     |        |
| <b>Type of comorbidity</b>                             |       |           |           |           |          |           |        |
| Diabetes                                               | 641   | (29.0)    | 160       | (30.1)    | 481      | (28.7)    | 0.5476 |
| Chronic pulmonary disease                              | 613   | (27.8)    | 160       | (30.1)    | 453      | (27.0)    | 0.1740 |
| Myocardial infarct                                     | 447   | (20.3)    | 91        | (17.1)    | 356      | (21.3)    | 0.0381 |
| Peripheral vascular disease                            | 473   | (21.4)    | 122       | (22.9)    | 351      | (21.0)    | 0.3330 |
| Any tumour                                             | 357   | (16.2)    | 97        | (18.2)    | 260      | (15.5)    | 0.1391 |
| Cerebrovascular disease                                | 414   | (18.8)    | 125       | (23.5)    | 289      | (17.3)    | 0.0013 |
| Moderate or severe renal disease                       | 274   | (12.4)    | 79        | (14.8)    | 195      | (11.6)    | 0.0506 |
| Congestive heart failure                               | 152   | (6.9)     | 64        | (12.0)    | 88       | (5.3)     | <.0001 |
| Ulcer disease                                          | 99    | (4.5)     | 30        | (5.6)     | 69       | (4.1)     | 0.1401 |
| Connective tissue disease                              | 92    | (4.2)     | 17        | (3.2)     | 75       | (4.5)     | 0.1974 |
| Dementia                                               | 77    | (3.5)     | 48        | (9.0)     | 29       | (1.7)     | <.0001 |
| Metastatic solid tumour<br>(other than bladder cancer) | 38    | (1.7)     | 21        | (3.9)     | 17       | (1.0)     | <.0001 |
| Mild liver disease                                     | 34    | (1.5)     | 6         | (1.1)     | 28       | (1.7)     | 0.3749 |
| Diabetes with end organ damage                         | 43    | (1.9)     | 12        | (2.3)     | 31       | (1.9)     | 0.5561 |
| Hemiplegia or paraplegia                               | 19    | (0.9)     | 8         | (1.5)     | 11       | (0.7)     | 0.0654 |
| HIV                                                    | 5     | (0.2)     | -         | -         | 5        | (0.3)     | 0.2071 |
| <b>Socio-economic status (SES)</b>                     |       |           |           |           |          |           | <.0001 |
| Low                                                    | 4956  | (32.9)    | 1291      | (39.9)    | 3665     | (31.0)    |        |
| Middle                                                 | 4707  | (31.3)    | 888       | (27.4)    | 3819     | (32.3)    |        |
| High                                                   | 3603  | (23.9)    | 588       | (18.2)    | 3015     | (25.5)    |        |
| Unknown                                                | 1781  | (11.8)    | 469       | (14.5)    | 1312     | (11.1)    |        |
| Tumour characteristics                                 |       |           |           |           |          |           |        |
| <b>cT stage (TNM)</b>                                  |       |           |           |           |          |           | <.0001 |
| cT2                                                    | 11664 | (77.5)    | 2525      | (78.0)    | 9139     | (77.4)    |        |
| cT3                                                    | 2362  | (15.7)    | 402       | (12.4)    | 1960     | (16.6)    |        |
| cT4a                                                   | 1021  | (6.8)     | 309       | (9.5)     | 712      | (6.0)     |        |
| <b>Focality of the tumour</b>                          |       |           |           |           |          |           | <.0001 |
| Multifocal                                             | 3009  | (20.0)    | 667       | (20.6)    | 2342     | (19.8)    |        |
| Unifocal                                               | 11059 | (73.5)    | 2240      | (69.2)    | 8819     | (74.7)    |        |

|                                     |             |             |             |        |
|-------------------------------------|-------------|-------------|-------------|--------|
| Unknown                             | 979 (6.5)   | 329 (10.2)  | 650 (5.5)   |        |
| <b>Localisation of the tumour</b>   |             |             |             | <.0001 |
| Trigone                             | 1091 (7.3)  | 256 (7.9)   | 835 (7.1)   |        |
| Dome                                | 622 (4.1)   | 113 (3.5)   | 509 (4.3)   |        |
| Right or left wall                  | 3490 (23.2) | 693 (21.4)  | 2797 (23.7) |        |
| Anterior wall                       | 399 (2.7)   | 85 (2.6)    | 314 (2.7)   |        |
| Posterior wall                      | 979 (6.5)   | 191 (5.9)   | 788 (6.7)   |        |
| Bladder neck                        | 572 (3.8)   | 134 (4.1)   | 438 (3.7)   |        |
| Left or right ureteral orifice      | 844 (5.6)   | 167 (5.2)   | 677 (5.7)   |        |
| Overlapping localisations           | 5449 (36.2) | 1161 (35.9) | 4288 (36.3) |        |
| Unknown                             | 1601 (10.6) | 436 (13.5)  | 1165 (9.9)  |        |
| Hospital characteristics            |             |             |             |        |
| <b>Type of hospital (diagnosis)</b> |             |             |             | 0.0027 |
| Community hospital                  | 6385 (42.4) | 1408 (43.5) | 4977 (42.1) |        |
| Non-university referral hospital    | 7831 (52.0) | 1688 (52.2) | 6143 (52.0) |        |
| University hospital                 | 831 (5.5)   | 140 (4.3)   | 691 (5.9)   |        |

*IQR: Interquartile range*

\* P-value was calculated using Chi-square for categorical variables and ANOVA for continuous variables

Supplementary Table 2: Patient- and tumour characteristics of untreated and treated patients in the BlaZIB cohort after propensity score matching\*

|                                                        | Total |           | Treatment |           | p-value** |           |        |
|--------------------------------------------------------|-------|-----------|-----------|-----------|-----------|-----------|--------|
|                                                        |       |           | Untreated | Treated   |           |           |        |
|                                                        | N     | (%)       | N         | (%)       | N         | (%)       |        |
| <b>Total</b>                                           | 674   | (100.0)   | 337       | (50.0)    | 337       | (50.0)    |        |
| <b>Patient characteristics</b>                         |       |           |           |           |           |           |        |
| <b>Gender</b>                                          |       |           |           |           |           | 0.4559    |        |
| Male                                                   | 461   | (68.4)    | 235       | (69.7)    | 226       | (67.1)    |        |
| Female                                                 | 213   | (31.6)    | 102       | (30.3)    | 111       | (32.9)    |        |
| <b>Age at diagnosis (median, IQR)</b>                  | 81.0  | 76.0-85.0 | 82.0      | 76.0-86.0 | 80.0      | 76.0-85.0 | 0.3135 |
| <b>Body Mass Index (median, IQR)</b>                   | 24.8  | 22.4-28.1 | 24.8      | 22.3-27.7 | 25.0      | 22.7-28.4 | 0.8989 |
| <b>Weighted Charlson Comorbidity Index</b>             |       |           |           |           |           | 0.8333    |        |
| 0                                                      | 165   | (24.5)    | 79        | (23.4)    | 86        | (25.5)    |        |
| 1                                                      | 195   | (28.9)    | 101       | (30.0)    | 94        | (27.9)    |        |
| 2                                                      | 149   | (22.1)    | 77        | (22.8)    | 72        | (21.4)    |        |
| 3 or more                                              | 165   | (24.5)    | 80        | (23.7)    | 85        | (25.2)    |        |
| <b>Performance status</b>                              |       |           |           |           |           | 0.8969    |        |
| ECOG 0                                                 | 120   | (17.8)    | 62        | (18.4)    | 58        | (17.2)    |        |
| ECOG 1                                                 | 190   | (28.2)    | 93        | (27.6)    | 97        | (28.8)    |        |
| ECOG 2 or higher                                       | 364   | (54.0)    | 182       | (54.0)    | 182       | (54.0)    |        |
| <b>Renal function (eGFR, mL/min/1.73m<sup>2</sup>)</b> | 54.0  | 37.0-69.0 | 54.0      | 35.0-72.0 | 54.0      | 39.2-68.0 | 0.5793 |
| <b>Socio-economic status (SES)</b>                     |       |           |           |           |           | 0.0314    |        |
| Low                                                    | 284   | (42.1)    | 127       | (37.7)    | 157       | (46.6)    |        |
| Middle                                                 | 241   | (35.8)    | 124       | (36.8)    | 117       | (34.7)    |        |
| High                                                   | 149   | (22.1)    | 86        | (25.5)    | 63        | (18.7)    |        |
| <b>Previous surgery</b>                                |       |           |           |           |           | 0.7277    |        |
| Yes                                                    | 180   | (26.7)    | 88        | (26.1)    | 92        | (27.3)    |        |
| No                                                     | 494   | (73.3)    | 249       | (73.9)    | 245       | (72.7)    |        |
| <b>Previous radiation</b>                              |       |           |           |           |           | 0.8798    |        |
| Yes                                                    | 47    | (7.0)     | 23        | (6.8)     | 24        | (7.1)     |        |
| No                                                     | 627   | (93.0)    | 314       | (93.2)    | 313       | (92.9)    |        |
| <b>Tumour characteristics</b>                          |       |           |           |           |           |           |        |
| <b>cT stage (TNM)</b>                                  |       |           |           |           |           | 0.6904    |        |
| cT2                                                    | 475   | (70.5)    | 241       | (71.5)    | 234       | (69.4)    |        |
| cT3                                                    | 143   | (21.2)    | 67        | (19.9)    | 76        | (22.6)    |        |
| cT4a                                                   | 56    | (8.3)     | 29        | (8.6)     | 27        | (8.0)     |        |
| <b>Focality of the tumour</b>                          |       |           |           |           |           | 0.4388    |        |
| Multifocal                                             | 187   | (27.7)    | 98        | (29.1)    | 89        | (26.4)    |        |
| Unifocal                                               | 487   | (72.3)    | 239       | (70.9)    | 248       | (73.6)    |        |

IQR: Interquartile range; ECOG: Eastern Cooperative Oncology Group; eGFR: estimated glomerular filtration rate; MDTM: Multidisciplinary team meeting

\* Patients were matched on age, body mass index, renal function, performance status, tumour stage, and previous radiation in abdomen/pelvic area

\*\* P-value was calculated using Chi-square for categorical variables and ANOVA for continuous variables

Supplementary Table 3: Uni- and multivariable Cox Proportional Hazards regression analyses on the association between patient-, tumour- and hospital characteristics and survival, in patients diagnosed with non-metastatic MIBC between 1 November 2017 and 31 October 2019, included in the BlaZIB study

|                                      | <b>Univariable model</b>       |               |                        |                  |                        |              |
|--------------------------------------|--------------------------------|---------------|------------------------|------------------|------------------------|--------------|
|                                      | overall<br>HR 95% CI           |               | <75 years<br>HR 95% CI |                  | ≥75 years<br>HR 95% CI |              |
| <b>Treatment</b>                     | ref.                           | ref.          | ref.                   | ref.             | ref.                   | ref.         |
| Treated                              | 4.71                           | 4.08 - 5.43   | 6.61                   | 4.89 - 8.93      | 3.24                   | 2.73 - 3.84  |
| Untreated                            |                                |               |                        |                  |                        |              |
| <b>Propensity score (continuous)</b> | 14.62                          | 10.73 - 19.93 | 639.34                 | 140.93 - 2900.36 | 7.95                   | 5.26 - 12.01 |
|                                      | <b>Multivariable model 1*</b>  |               |                        |                  |                        |              |
|                                      | overall<br>HR 95% CI           |               | <75 years<br>HR 95% CI |                  | ≥75 years<br>HR 95% CI |              |
| <b>Treatment</b>                     | ref.                           | ref.          | ref.                   | ref.             | ref.                   | ref.         |
| Treated                              | 2.78                           | 2.31 - 3.36   | 4.06                   | 2.80 - 5.87      | 2.40                   | 1.96 - 2.95  |
| Untreated                            |                                |               |                        |                  |                        |              |
| <b>Propensity score (continuous)</b> | 5.36                           | 3.67 - 7.83   | 178.69                 | 36.00 - 887.02   | 3.43                   | 2.12 - 5.55  |
|                                      | <b>Multivariable model 2**</b> |               |                        |                  |                        |              |
|                                      | overall<br>HR 95% CI           |               | <75 years<br>HR 95% CI |                  | ≥75 years<br>HR 95% CI |              |
| <b>Treatment</b>                     | ref.                           | ref.          | ref.                   | ref.             | ref.                   | ref.         |
| Treated                              | 2.88                           | 2.38 - 3.47   | 4.79                   | 3.33 - 6.90      | 2.46                   | 1.98 - 3.05  |
| Untreated                            |                                |               |                        |                  |                        |              |
| <b>Propensity score (continuous)</b> | 0.22                           | 0.07 - 0.65   | 8.92                   | 0.16 - 508.91    | 0.70                   | 0.02 - 30.31 |

HR: Hazard Ratio; 95% CI: 95% Confidence Interval; ECOG: Eastern Cooperative Oncology Group; eGFR: estimated glomerular filtration rate; MDTM: Multidisciplinary team meeting

\* Multivariable model 1 includes treatment (yes/no) and propensity score

\*\* Multivariable model 2 includes treatment (yes/no), propensity score, gender, age, body mass index, Weighted Charlson Comorbidity Index, performance status, renal function, socio-economic status, tumour stage, whether the patient was discussed in a MDTM, previous surgery in abdomen/pelvic area, previous radiation in abdomen/pelvic area
